# Supplementary material for: Measurements of non-volatile aerosols with a VTDMA and their correlationswith carbonaceous aerosols in Guangzhou, China
Source: Copernicus journal article supplement (doi:10.5194/acp-16-8431-2016), 2016-07-12
Supplement: Supplementary file 1 [file acp-16-8431-2016-supplement.pdf]

Supplement of Atmos. Chem. Phys., 16, 8431–8446, 2016  
<http://www.atmos-chem-phys.net/16/8431/2016/>  
doi:10.5194/acp-16-8431-2016-supplement  
© Author(s) 2016. CC Attribution 3.0 License.

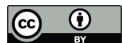

Atmospheric  
Chemistry  
and Physics  
Open Access  
EGU

*Supplement of*

## **Measurements of non-volatile aerosols with a VTDMA and their correlations with carbonaceous aerosols in Guangzhou, China**

**Heidi H. Y. Cheung et al.**

*Correspondence to:*

The copyright of individual parts of the supplement might differ from the CC-BY 3.0 licence.

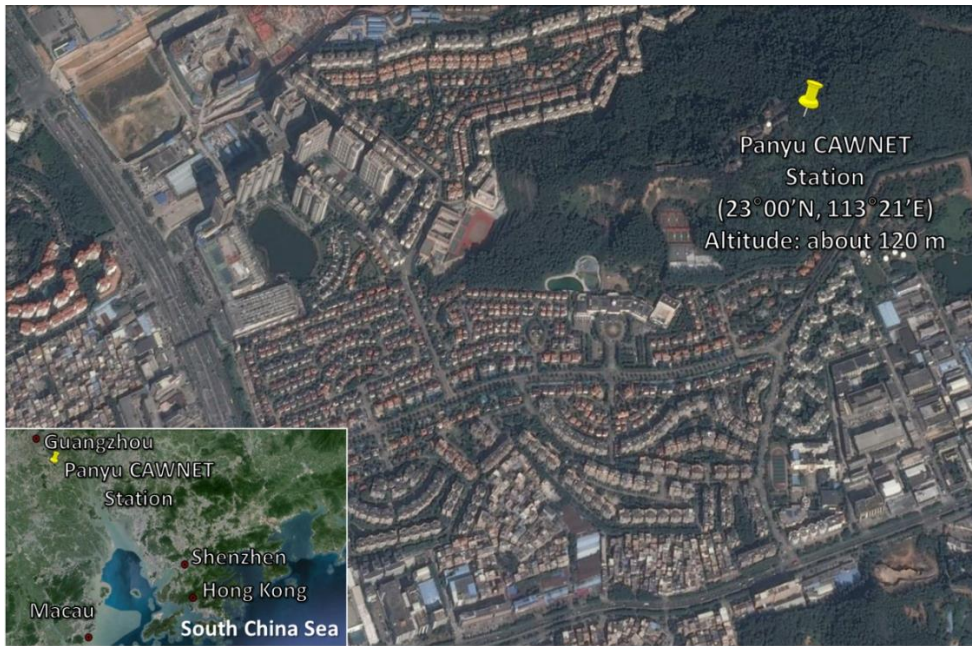

Fig. S1. Location of the measurement site.

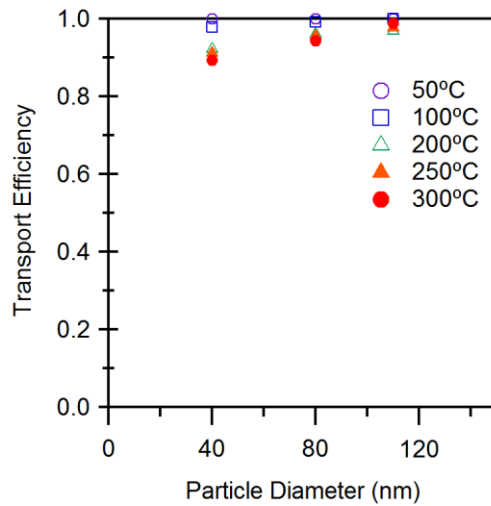

1  
2 Fig. S2. Transport efficiency of NaCl in the VTDMA as a function of particle diameter and  
3 heating temperature.

4

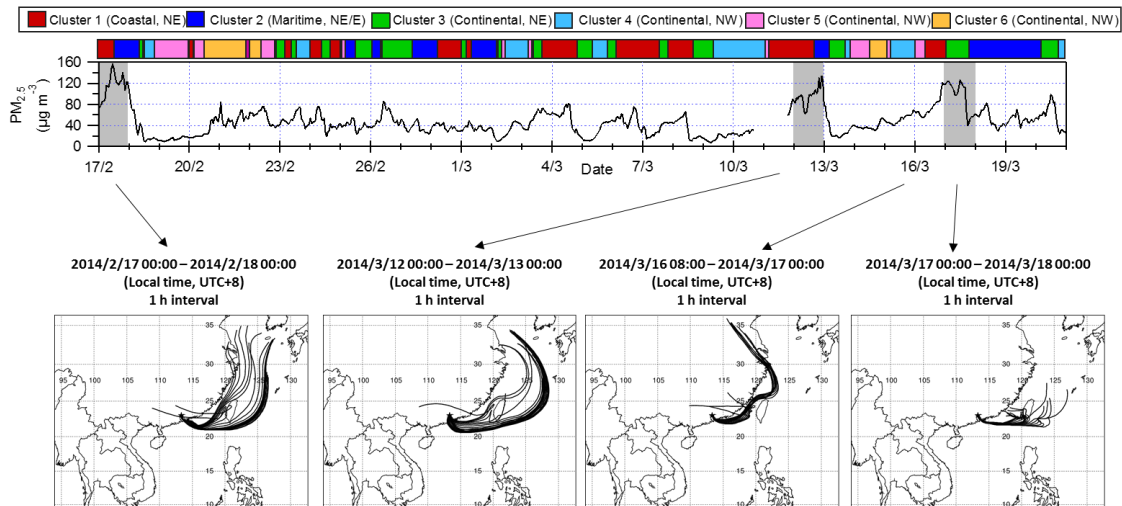

5  
6 Fig. S3. Time series of PM<sub>2.5</sub> concentrations and 72 h back trajectories at hourly intervals on  
7 17 Feb, 12, 16 and 17 Mar 2014.

8

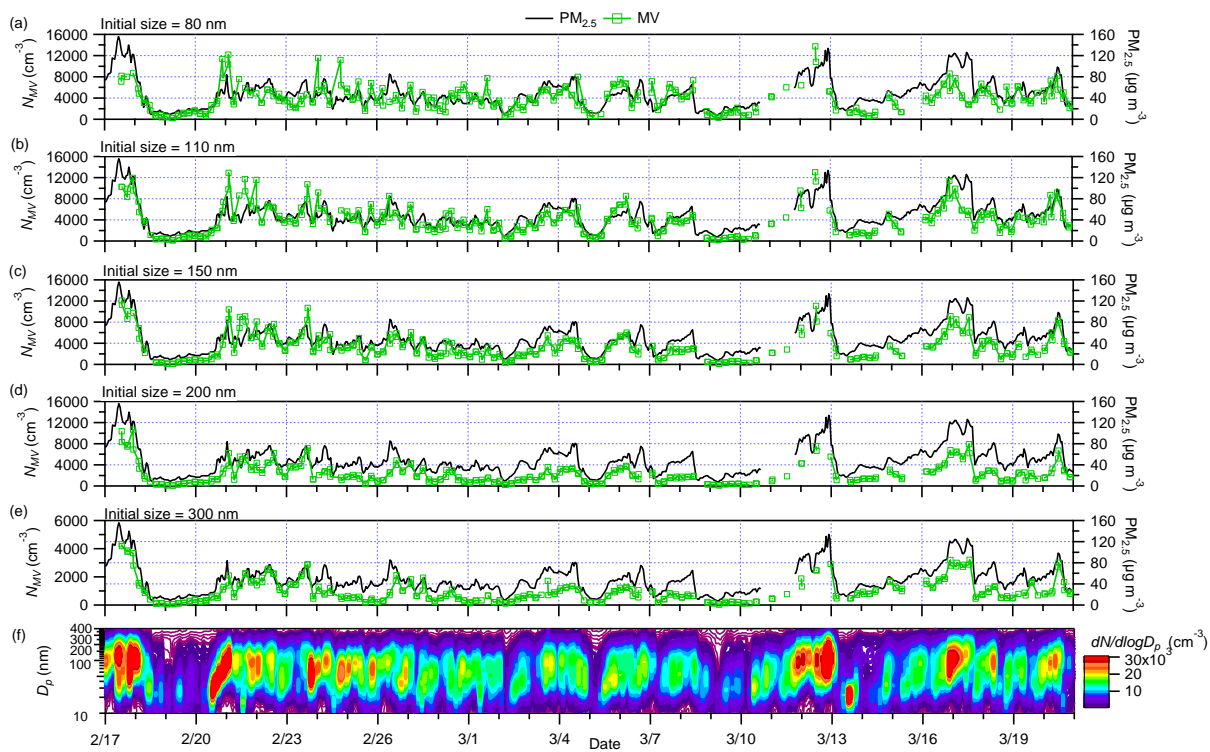

1  
 2 Fig. S4. (a–e) Time series of number concentrations of MV particles having initial diameters of  
 3 80 nm to 300 nm and (f) particle number size distributions during the campaign. Time series of  
 4  $\text{PM}_{2.5}$  concentrations are plotted on the right axis in (a) to (e).

5

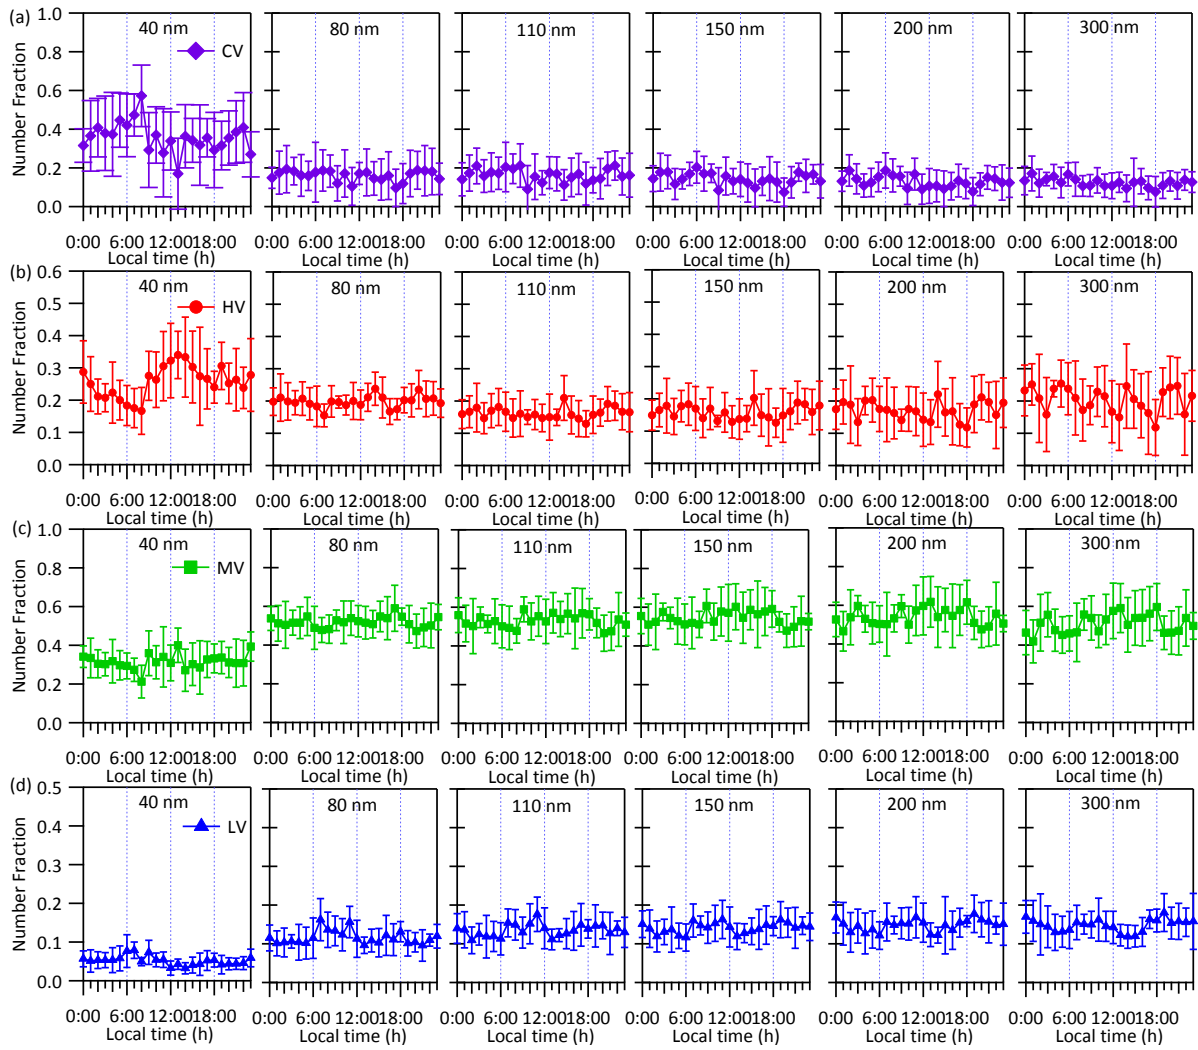

1  
 2 Fig. S5. (a–d) Diurnal variations in the number fractions of CV, HV, MV and LV particles  
 3 having (from left to right) the six selected diameters ranging from 40 nm to 300 nm. Error bars  
 4 represent one standard deviation.
